# Supplementary material
Source: Springer Nature journal article supplement (https://www.springermedizin.de/resource/supplementary/13054_2012_1709_MOESM3_ESM.pdf/9711274)

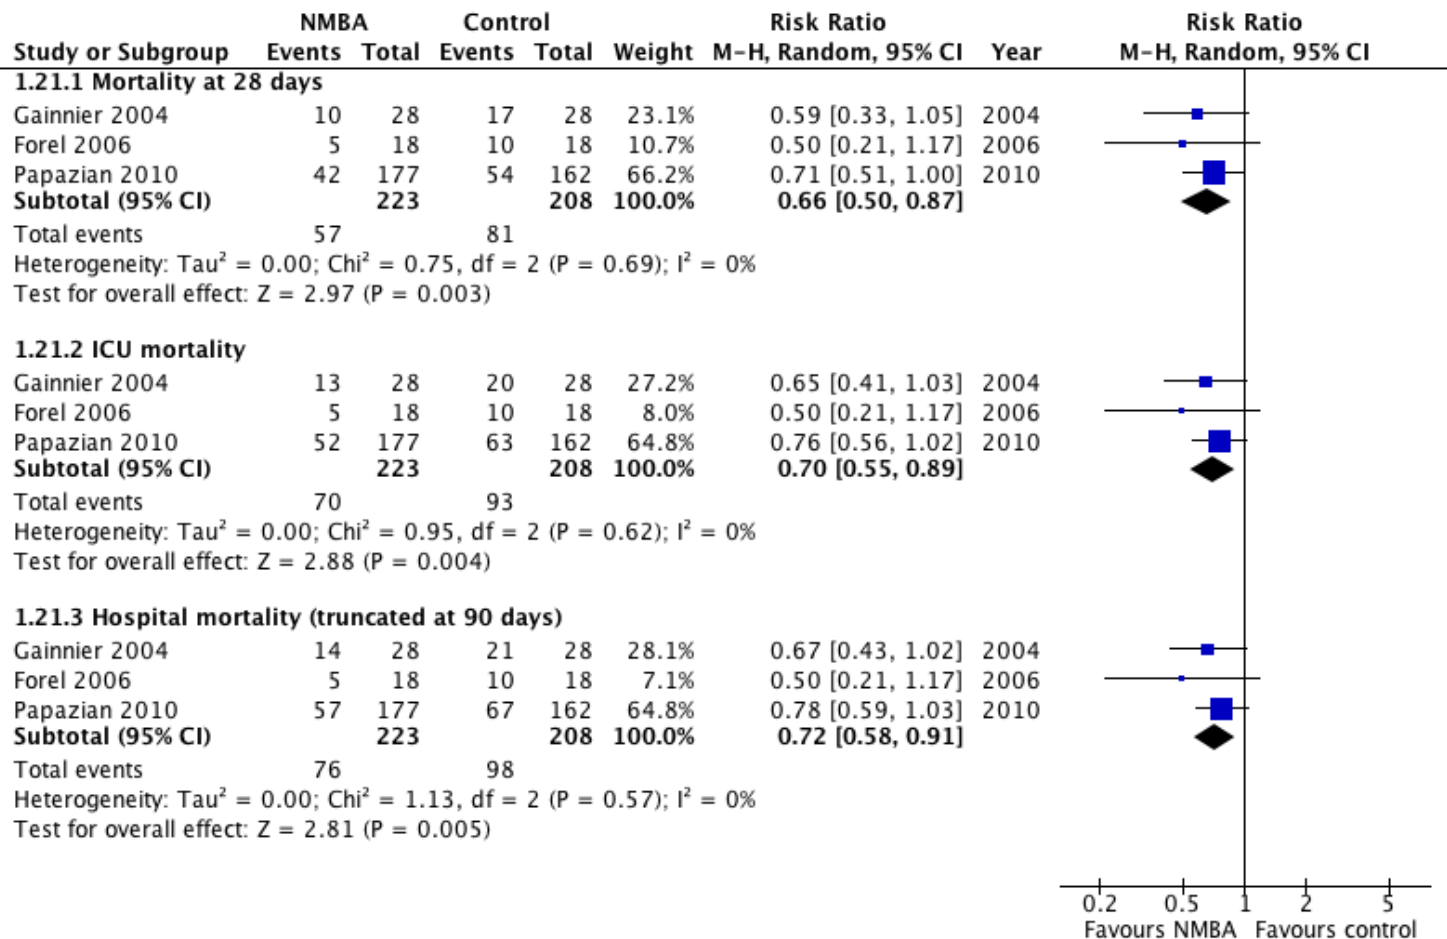

Supplement: MOESM3 [file 9711274]
